# Supplementary material for: Spatial profiles of the bacterial microbiota throughout the gastrointestinal tract of dairy goats
Source: Springer Nature journal article supplement (doi:10.1007/s00253-024-13200-8), 2024-06-01
Supplement: MOESM1 [file 253_2024_13200_MOESM1_ESM.pdf]

**Supplemental Material**

**Journal name**

Applied Microbiology and Biotechnology

**Manuscript Title**

Spatial profiles of the bacterial microbiota throughout the gastrointestinal tract of dairy goats

**The name(s) of the author(s):**

Qingyong Hu<sup>1</sup>, Jun Luo<sup>1\*</sup>, Fei Cheng<sup>1</sup>, Ping Wang<sup>1</sup>, Ping Gong<sup>2</sup>, Xuefeng Lv<sup>2</sup>, Xinpei Wang<sup>1</sup>, Min Yang<sup>1</sup>, Pengbo Wei<sup>1</sup>

**The affiliation(s) and address(es) of the author(s):**

<sup>1</sup>*Shaanxi Provincial Key Laboratory of Agricultural Molecular Biology, College of Animal Science and Technology, Northwest A & F University, Yangling 712100, PR China*

<sup>2</sup>*Institute of Animal Husbandry Quality Standards, Xinjiang Academy of Animal Husbandry Science, Urumqi Xinjiang 830000, PR China*

**The e-mail address, telephone and fax numbers of the corresponding author**

\* Corresponding author: Jun Luo. E-mail: [luojun@nwafu.edu.cn](mailto:luojun@nwafu.edu.cn)

**Table S1** Chemical composition and nutrient levels of the diet (air-dry basis)

| Items                          | Percent (%) |
|--------------------------------|-------------|
| Ingredient                     |             |
| Corn                           | 15.40       |
| Wheat Bran                     | 4.80        |
| Soybean meal                   | 12.00       |
| Rapeseed meal                  | 5.00        |
| Salt                           | 0.80        |
| Dicalcium phosphate            | 0.80        |
| Premix <sup>(1)</sup>          | 1.20        |
| Corn silage                    | 32.86       |
| Alfalfa hay                    | 27.14       |
| Nutrient levels <sup>(2)</sup> |             |
| Metabolic energy (MJ/Kg)       | 8.74        |
| Crude protein                  | 15.31       |
| Ether extract                  | 2.32        |
| Neutral detergent fiber        | 39.93       |
| Acid detergent fiber           | 25.77       |
| Calcium                        | 0.53        |
| Phosphorus                     | 0.35        |

(1) The premix provides the following per kg of diets: VA 100,000 IU; VD<sub>3</sub> 40,000 IU; VE 300 IU; Mn (as manganese sulfate) 600 mg; Zn (as zinc sulfate) 1000 mg; Cu (as copper sulfate) 200 mg; Fe (as ferrous sulfate) 1100 mg.

(2) All of the data are analyzed values except for metabolic energy.

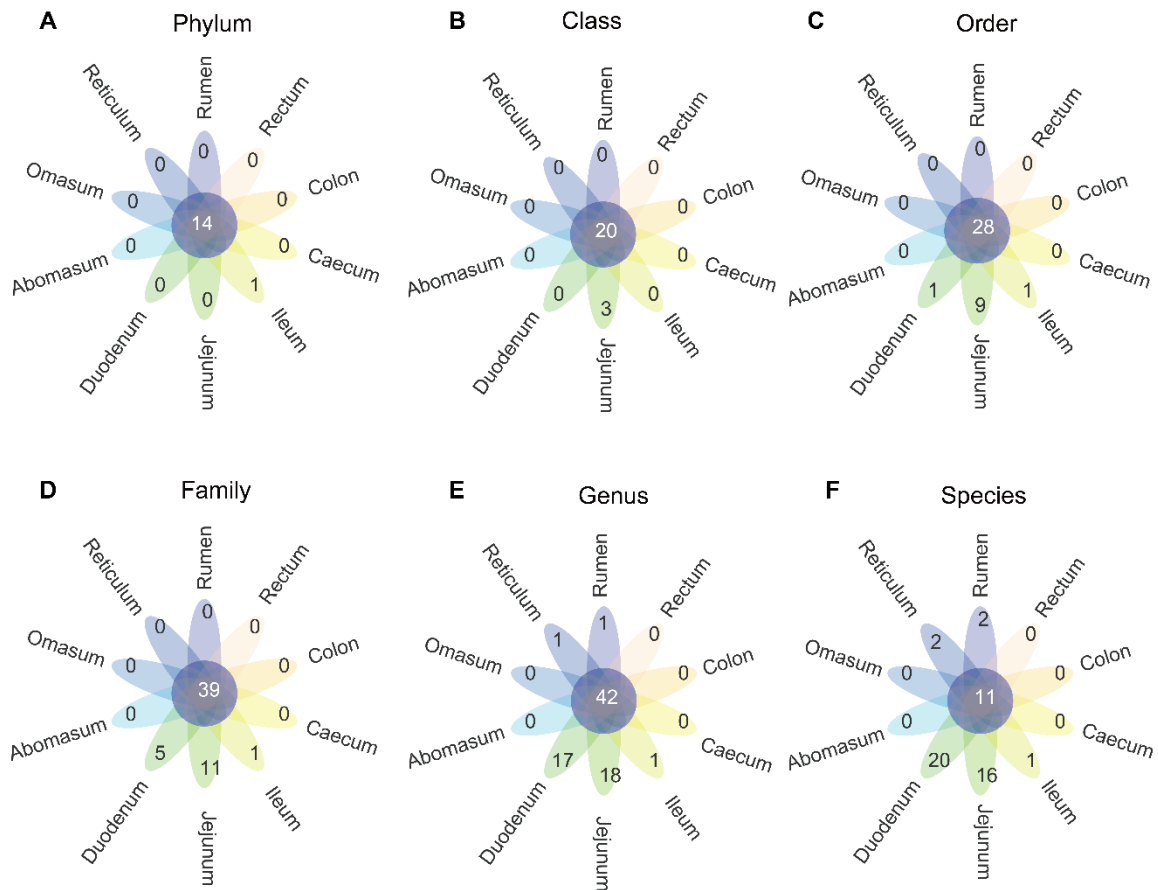

**Fig. S1** The shared taxon among the GIT segments. (a) Venn diagram showing the phylum shared among ten GIT segments. (b) Venn diagram showing the class shared among ten GIT segments. (c) Venn diagram showing the order shared among ten GIT segments. (d) Venn diagram showing the family shared among ten GIT segments. (e) Venn diagram showing the genus shared among ten GIT segments. (f) Venn diagram showing the species shared among ten GIT segments.

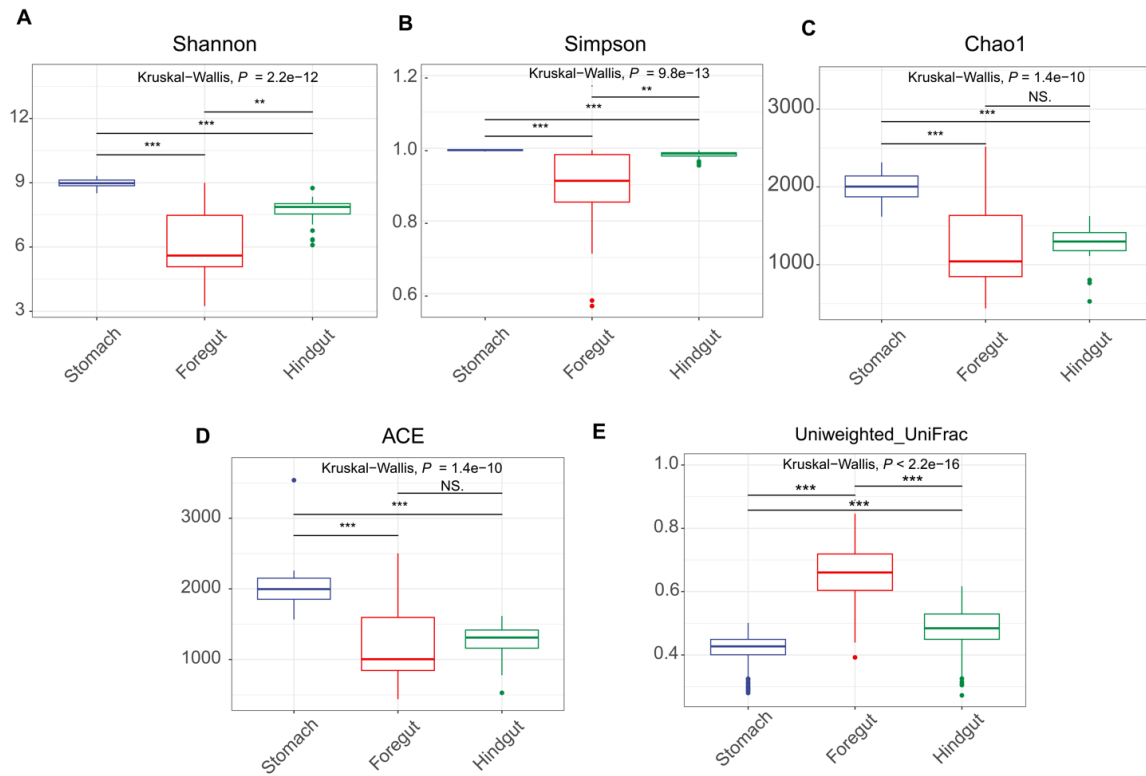

42

43 **Fig. S2**  $\alpha$ -diversity indexes and unweighted UniFrac index of three GIT clusters, Stomach (rumen,  
 44 reticulum, omasum, abomasum); Foregut (duodenum, jejunum, ileum); Hindgut (cecum, colon, rectum). (a)  
 45 The Shannon index of three GIT clusters. (b) The Simpson index of three GIT clusters. (c) The Chao1  
 46 index of three GIT clusters. (d) The ACE index of three GIT clusters. (e) The unweighted UniFrac index of  
 47 three GIT clusters.

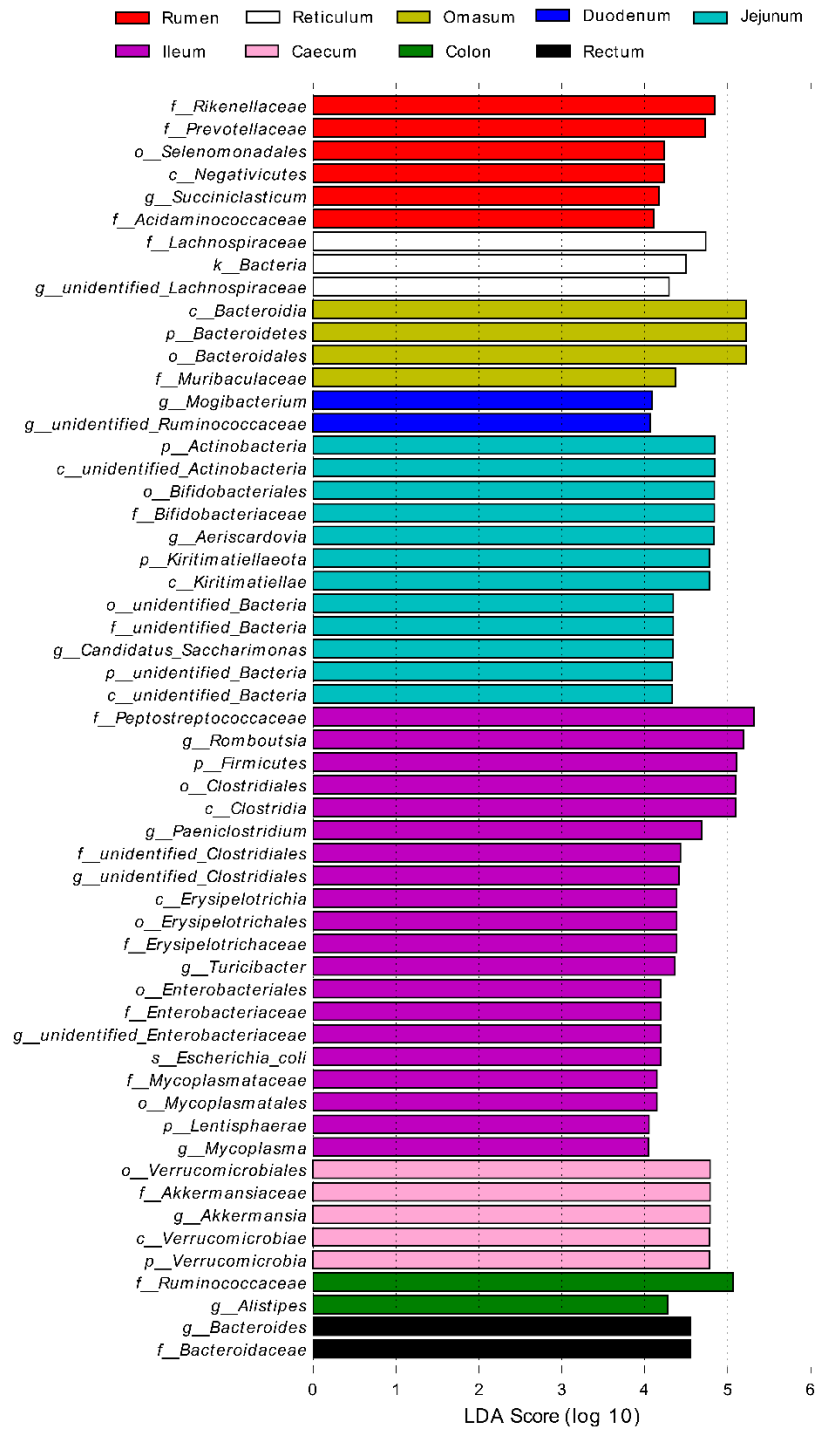

48

49 **Figure. S3** The LEfSe analysis histogram of ten GIT segments. The ordinate is the taxa with significant  
50 differences between groups, and the abscissa is a bar graph displaying the LDA logarithmic score value of  
51 each taxon. The longer the length, the more significant the difference of the taxon.

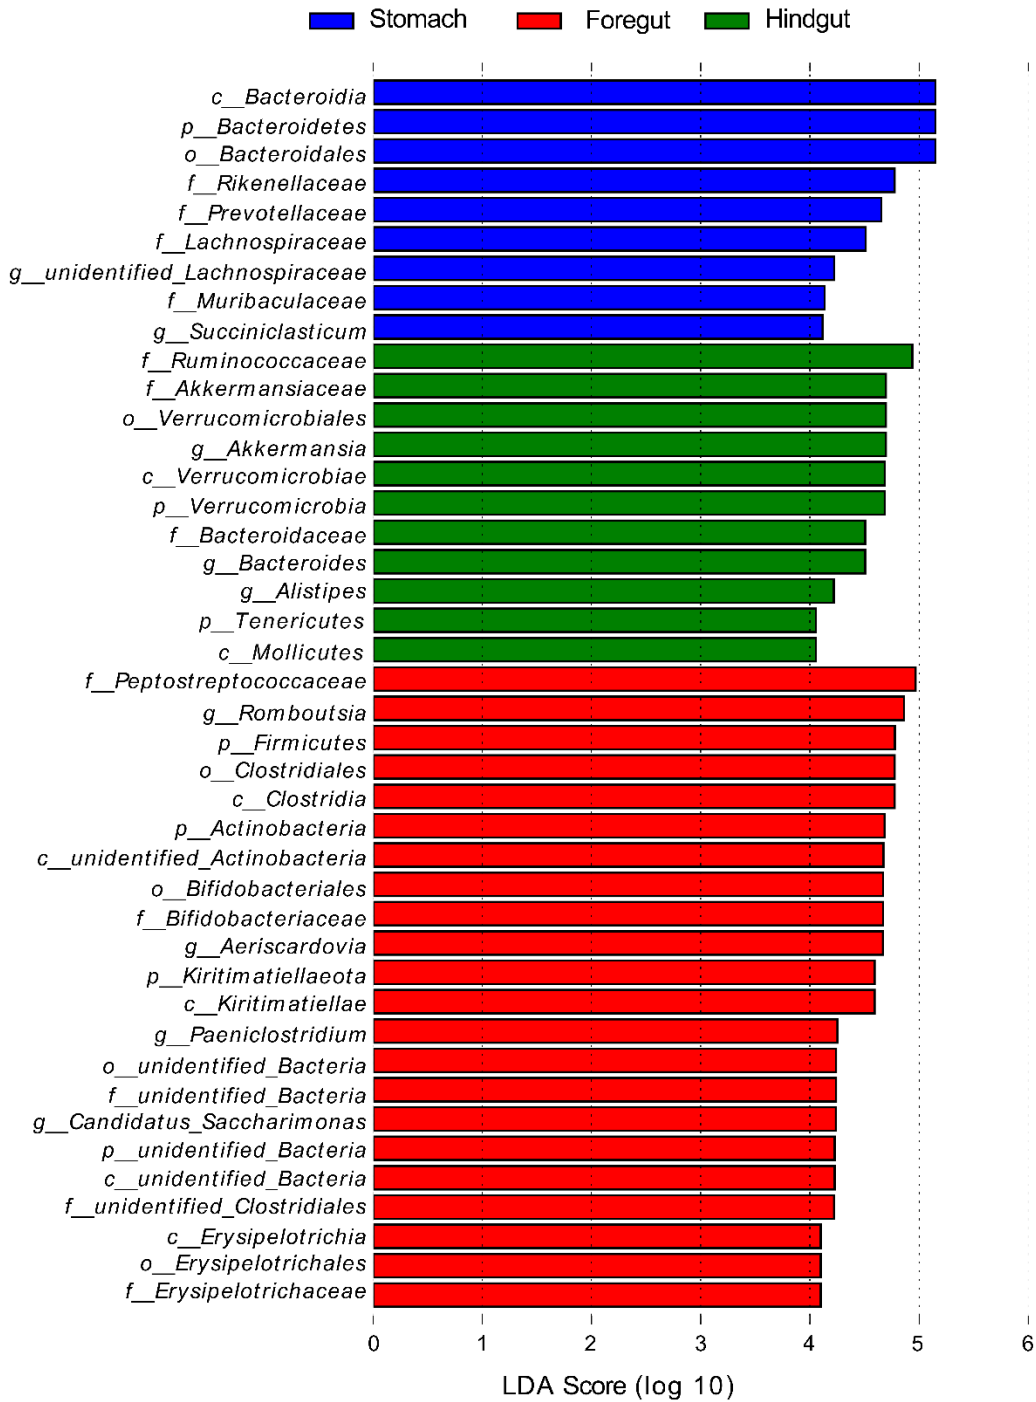

**Figure. S4** The LEfSe analysis histogram of three GIT clusters, Stomach (rumen, reticulum, omasum, abomasum); Foregut (duodenum, jejunum, ileum); Hindgut (cecum, colon, rectum). The ordinate is the taxa with significant differences between groups, and the abscissa is a bar graph displaying the LDA logarithmic score value of each taxon. The longer the length, the more significant the difference of the taxon.

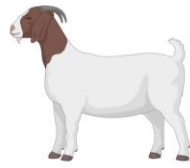

Dairy goat

*Kiritimatiellaeota*: 5.4%

**Milk fat:** 10.1 g /8 oz serving

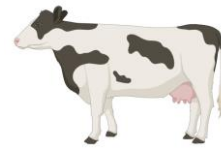

Dairy cow

*Kiritimatiellaeota*: <0.1%

**Milk fat:** 7.69 g /8 oz serving

(Amin et al., 2023)

(Collard and McCormick 2021)

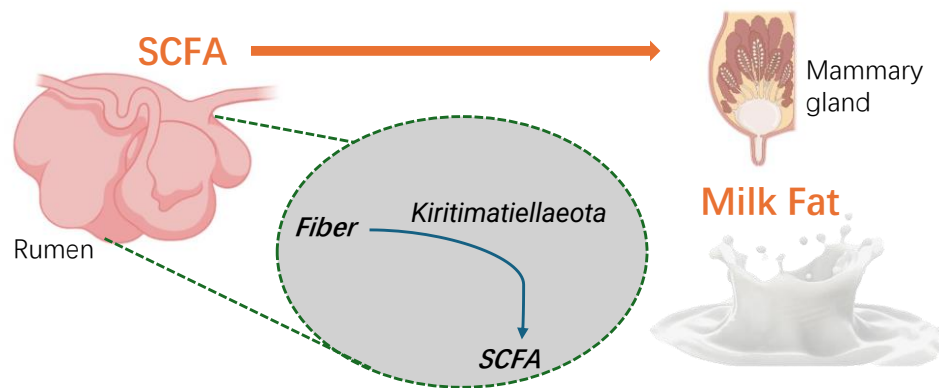

58

59 **Figure. S5** Potential causes of milk fat inconsistency caused by differences in rumen *Kiritimatiellaeota*

60 between dairy goats and dairy cows.
